# Supplementary material for: Tau seeding and spreading in vivo is supported by both AD-derived fibrillar and oligomeric tau
Source: PubMed Central journal article supplement (PMC10329061; doi:10.1007/s00401-023-02600-1), 2023-06-21
Supplement: 401_2023_2600_MOESM1_ESM.pdf [file 401_2023_2600_MOESM1_ESM.pdf]

| <b>Antibody</b>           | <b>Reactivity</b>            | <b>Species</b> | <b>Reference</b>                 | <b>IHC dilution</b>    | <b>IF dilution</b> | <b>WB dilution</b> |
|---------------------------|------------------------------|----------------|----------------------------------|------------------------|--------------------|--------------------|
| <b>AT8 (biotinylated)</b> | Human Tau<br>pS212,<br>pT214 | Mouse          | Thermofisher<br>(MN1020B)        | 1:400                  | 1:400              |                    |
| <b>AT100</b>              | Human Tau<br>pS202,<br>pT205 | Mouse          | Thermofisher<br>(MN1060)         | 1:4000                 | 1:1000             |                    |
| <b>Bassoon</b>            | Mouse<br>presynaptic         | Guinea<br>pig  | Synaptic<br>systems<br>(141 004) |                        | 1:1500             |                    |
| <b>Clec7a (murine)</b>    | murine<br>Dectin-1           | Rat            | InvivoGen                        |                        | 1:50               |                    |
| <b>GFAP-CY3</b>           | GFAP                         | Mouse          | Sigma-<br>Aldrich<br>(C9205)     |                        | 1:10,000           |                    |
| <b>Iba1</b>               | Iba1                         | Rabbit         | Wako<br>(019-19741)              |                        | 1:1000             |                    |
| <b>Iba1</b>               | Iba1                         | Rabbit         | Abcam<br>(ab178847)              | 1:500<br>(autostainer) |                    |                    |
| <b>pS422</b>              | Human Tau<br>pS422           | Rabbit         | Abcam<br>(ab79415)               |                        | 1:1000             |                    |
| <b>PSD95</b>              | Mouse<br>postsynaptic        | Rabbit         | Thermofisher<br>(51-6900)        |                        | 1:1000             |                    |
| <b>Tau DAKO</b>           | Total Tau                    | Rabbit         | DAKO<br>(A0024)                  |                        |                    | 1:5000             |

**Table S1:** list of the primary antibodies used in the present study and their working concentration.
